# Supplementary material for: Floral Scent Evolution in the Genus Jaborosa (Solanaceae): Influence of Ecological and Environmental Factors
Source: MDPI journal article supplement (doi:10.3390/plants10081512), 2021-07-23
Supplement: s1 [file s1]

**Table S1.** A. Permutation importance value (%) of the bioclimatic variables used for the Ecological Niche Models (ENMs) of the Andean and the Subtropical Lowland clades of *Jaborosa*.

| Bioclimatic variable                          | Permutation importance |
|-----------------------------------------------|------------------------|
| <i>Andean clade</i>                           |                        |
| mean diurnal range temperature                | 46.1                   |
| specific humidity seasonality                 | 20.4                   |
| maximum temperature of the warmest month      | 15                     |
| temperature seasonality <sup>2</sup>          | 12.2                   |
| altitude                                      | 2.5                    |
| mean temperature of the least humid quarter   | 2.1                    |
| mean specific humidity of the coldest quarter | 1.1                    |
| isothermality <sup>1</sup>                    | 0.6                    |
| <i>Subtropical Lowland clade</i>              |                        |
| altitude                                      | 72.6                   |
| specific humidity seasonality <sup>3</sup>    | 17.3                   |
| specific humidity of the most humid month     | 3.8                    |
| mean diurnal range temperature                | 3                      |
| specific humidity of the least humid month    | 2.1                    |
| isothermality <sup>1</sup>                    | 1.3                    |

<sup>1</sup>mean diurnal range temperature/temperature annual range \* 100

<sup>2</sup>standard deviation \*100

<sup>3</sup>coefficient of variation
