# Supplementary material for: Floral Scent Evolution in the Genus Jaborosa (Solanaceae): Influence of Ecological and Environmental Factors
Source: MDPI journal article supplement (doi:10.3390/plants10081512), 2021-07-23
Supplement: s1 [file s1]

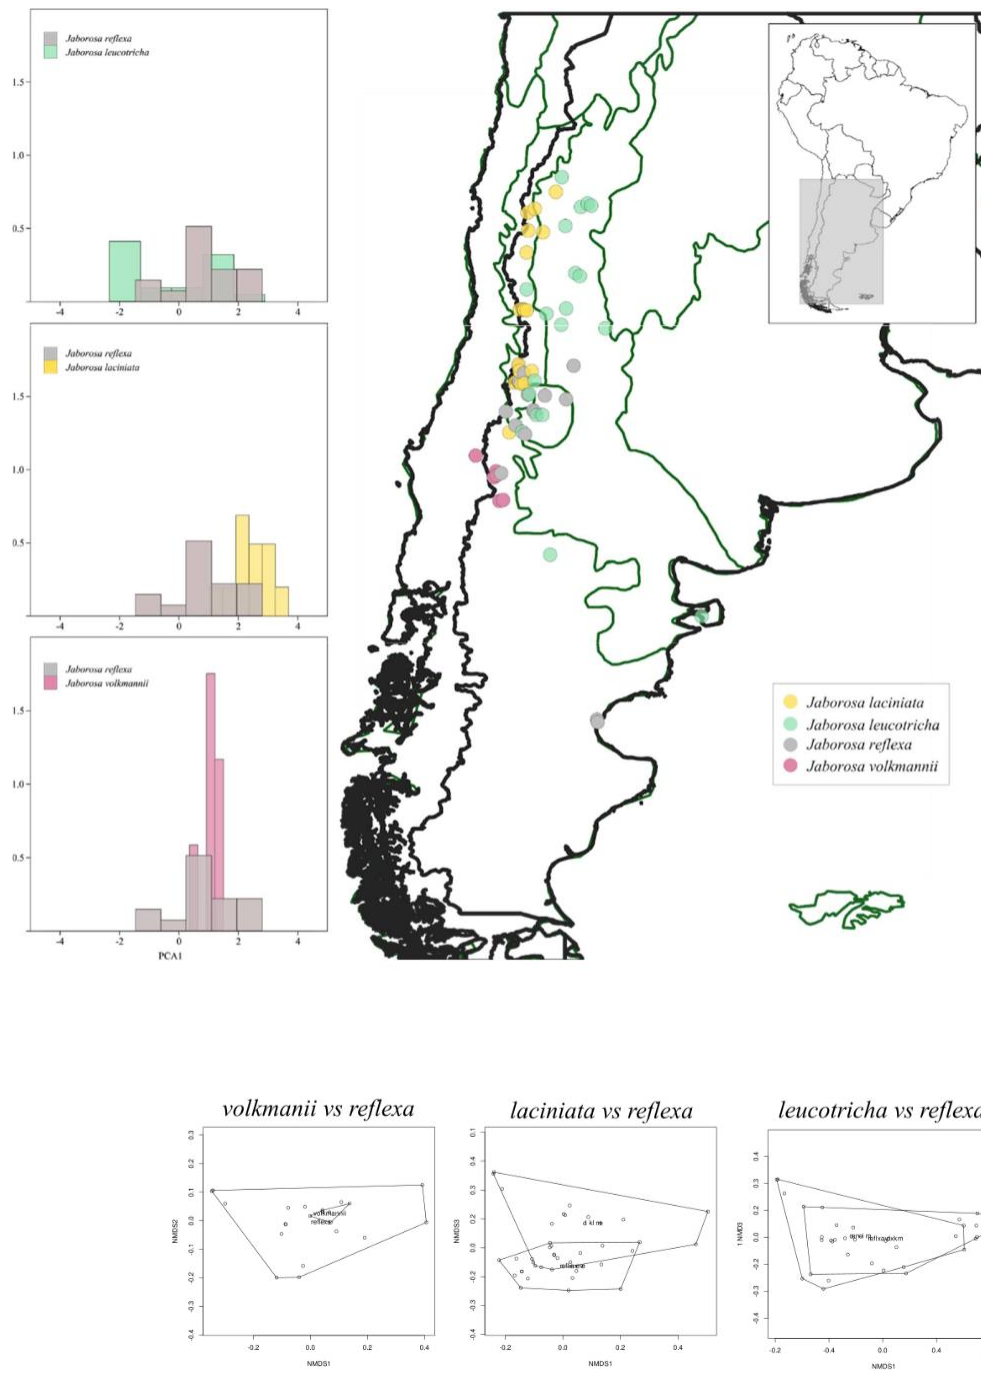

Figure S4: Environmental niche among *Jaborosa reflexa* and other three *Jaborosa* species that totally or partially overlap in their geographical distribution (*J. laciniata*, *J. leucotricha*, *J. volkmannii*). The environmental niche of *J. reflexa* significantly differed from *J. laciniata*, and partially overlapped with *J. leucotricha* and *J. volkmannii*.
