# Supplementary material for: Floral Scent Evolution in the Genus Jaborosa (Solanaceae): Influence of Ecological and Environmental Factors
Source: MDPI journal article supplement (doi:10.3390/plants10081512), 2021-07-23
Supplement: s1 [file s1]

Table S6. Association between environmental suitability and floral scent in *Jaborosa*. Phylogenetic generalized least squares (PGLS) correlations between scent axes (NMDS1 and NMDS2 axes from Fig. 3) and environmental axes (PC1 and PC2 axes from the environmental PCA). Two evolutionary models were fitted for correlated evolution: Brownian Motion (BM, Felsenstein, 1973) and Ornstein-Uhlenbeck (OU, Hansen, 1997).

| Environmental axis | Scent axis | F-value | p-value       | AIC   | Model |
|--------------------|------------|---------|---------------|-------|-------|
| PC1                | NMDS1      | 0.35    | 0.5738        | 32.46 | BM    |
|                    |            | 1.60    | 0.2524        | 33.79 | OU    |
| PC1                | NMDS2      | 0.15    | 0.7144        | 32.73 | BM    |
|                    |            | 6.86    | <b>0.0396</b> | 31.27 | OU    |
| PC2                | NMDS1      | 0.00    | 0.9953        | 24.81 | BM    |
|                    |            | 0.11    | 0.7511        | 24.85 | OU    |
| PC2                | NMDS2      | 0.11    | 0.7523        | 24.67 | BM    |
|                    |            | 0.17    | 0.6986        | 24.80 | OU    |
| DF:                | 6          |         |               |       |       |
