# Supplementary material for: Floral Scent Evolution in the Genus Jaborosa (Solanaceae): Influence of Ecological and Environmental Factors
Source: Plants (Basel). 2021 Jul 23;10(8):1512. doi: 10.3390/plants10081512 (PMC8398055; doi:10.3390/plants10081512)
Supplement: Supplementary file 1 [file plants-10-01512-s001.zip › Table S2.xls]

## Sheet: summary by class
Table S2: Floral scent composition and emission rates from single flowers of Jaborosa integrifolia and J. runcinata, collected using dynamic headspace methods and analyzed via GC-MS.
Compounds are listed in order of retention time (RT, min.) on a polar GC column, showing mean +/- SEM (N) for the relative percentage of each compound in the scent bouquets, along with
standardized emission rates (ug / flower / hr) during the first hour of anthesis for these night-blooming species. Data from 2008 and 2010 represent plants cultivated in Córdoba, Argentina and
Ithaca, USA, respectively, whereas data from 2009 were collected from wild plants growing in natural populations near Diamante, Argentina.
Volatile compound, class	RT	calc KI	mass spectral ion fragments (m/z)	J. integrifolia						J. runcinata
				2008		2009		2010		2009
Aliphatic compounds (7)				mean	sem (2)	mean	sem (5)	mean	sem (10)	mean	sem (5)
nr. 1-pentadecene	13.078	1530.2	55(100), 41(96), 43(69), 56(58), 57(50), 69(48), 70(36), 83(35), 97(27), 42(25)	0.445	0.225	0.966	0.354804	0.002	0.002
nr. tetradecanal	17.858	1927.6	43(100), 41(95), 57(93), 55(74), 82(45), 44(41), 45(40), 69(35), 67(32), 81(30)	0.08	0.03	0.042	0.0239583	0.272	0.0276405
unsaturated aliphatic aldehyde	18.317	1970.1	41(100), 55(95), 67(37), 43(35), 69(30), 81(29), 57(28), 54(26), 68(23), 82(23)	0.27	0.07	0.16	0.0575326	0.67	0.173449
nr. pentadecanal	18.979	2024.5	41(100), 43(68), 57(49), 85(45), 42(42), 55(39), 82(30), 44(24), 67(23), 69(22)	0.05	0.02	0.014	0.006	0.078	0.0136463
unsaturated aliphatic aldehyde	19.41	2087.9	43(100), 57(71), 41(63), 44(53), 81(42), 69(39), 55(38), 42(38), 96(37), 58(33)	0.09	0.06	0.002	0.002	0.009	0.00604612
nr. hexadecanal	20.057	2149.2	43(100), 41(97), 57(80), 55(60), 82(45), 44(33), 68(32), 69(30), 67(29), 96(27)	0.685	0.035	0.594	0.130522	0.854	0.105569
unsaturated aliphatic aldehyde	20.482	2198.7	55(100), 41(81), 43(33), 56(30), 67(28), 69(25), 42(23), 81(21), 54(20), 57(20)	16.025	1.555	11.326	2.44629	9.841	0.751819
Aromatic compounds (12)
benzaldehyde	13.155			10.28	6.88	17.41	4.3248	19.423	3.95376	91.616	4.86284
methyl benzoate	14.436			0.2	0.06	0.298	0.0556237	0.221	0.0538403
salicylaldehyde	15.19	1691.4		0.14	0.09	0.098	0.0525738	0.135	0.0432628
benzyl acetate	15.712			0.235	0.175	0.108	0.0432897	0.186	0.0497371
methyl salicylate	16.355			29.98	16.26	53.342	7.76022	33.668	5.64501
benzyl alcohol	17.341			13.545	12.805	4.374	2.14077	10.75	3.16381	5.328	3.12711
benzyl isovalerate	17.573			0.115	0.055	0.514	0.0527826	0.031	0.0192902
3-methyl butyl (isoamyl) benzoate	17.834			0	0	0.146	0.106939	0	0
3-methyl butyl (isoamyl) salicylate	19.279			0	0	0.074	0.0309192	0	0
dimethyl salicylate	19.34			2.11	0.52	0	0	0.046	0.0388501
benzyl benzoate	24.61			0.265	0.155	0.706	0.272481	0.604	0.189022	2.846	2.2244
benzyl salicylate	25.997			0.565	0.275	0.256	0.143478	0.633	0.121774	0.21	0.179276
Monoterpene (1)
linalool	13.324			0	0	0.354	0.0896995	0.578	0.0856193
Irregular terpenoid (1)
6,11-Dimethyl-2,6,10-dodecatrien-1-ol?	18.64	1991.8	69(100), 41(96), 43(21), 67(20), 109(19), 55(18), 123(15), 81(13), 53(11), 179(10)	0.035	0.005	0.016	0.00678233	0.146	0.0350301
Sesquiterpenes (5)
(E,E)-α-farnesene	15.95			0	0	0	0	0.002	0.002
farnesol isomer	20.883			2.875	0.035	1.022	0.325383	4.968	0.994339
(E,E)-farnesal	21.328	2365	41(100), 69(95), 84(52), 81(15), 55(15), 53(13), 67(11), 43(10), 93(7), 70(6)	21.49	5.21	7.916	1.32188	17.616	1.69459
farnesol isomer	21.705			0.085	0.055	0.03	0.0154919	0.138	0.0306159
farnesol isomer	22.063			0.425	0.015	0.302	0.0728972	0.35	0.0654896
Total volatile emissions, ug / flower / hr (*)				69.3	42	14.6	6.49	56.75	7.98	3.55	2.31
26 total volatiles
(*) scent emissions reported in toluene equivalents based on TIC peak areas and internal standard
bold text: identifications verified by co-chromatography with authentic standards
blue text: tentative identifications suggested by mass spectra and retention index consistent with published data (NIST webbook)
italic text: unknowns assigned to compound class due to mass spectra (listing the 10 most abundant m/z ion fragments in descending order from the base peak (= 100%))
