# Supplementary material for: Floral Scent Evolution in the Genus Jaborosa (Solanaceae): Influence of Ecological and Environmental Factors
Source: Plants (Basel). 2021 Jul 23;10(8):1512. doi: 10.3390/plants10081512 (PMC8398055; doi:10.3390/plants10081512)
Supplement: Supplementary file 1 [file plants-10-01512-s001.zip › Table S3.xlsx]

## Sheet: Table S3
Table S3: Floral scent composition (presence, relative %) for eight species of Jaborosa, collected using solid phase extraction micro-traps, combined with thermal desorption-GC-MS.																													Relative abundance (%)
Compounds are listed in order of retention time (RT, min.) on a non-polar GC column (DB-5 equivalent), showing relative percentage of each compound per replicate sample.																													0
Jaborosa species abbreviations: J. reflexa (ref); J. integrifolia (int); J. runcinata (run); J. odonelliana (odo); J. rotacea (rot); J. sativa (sat); J. laciniata (lac); J. leucotricha (leu).																													0.01 to 0,9 %
																													1 to 9.99 %
Volatile compounds, Classes	RT, min.	Mass Spectral Ion Fragments (m/z)	ref1	ref2	ref3	ref4	ref5	ref6	ref7	ref8	ref9	ref10	int 1	int 2	run1	run2	odo1	odo2	rot1	rot2	sat1	sat2	lac1	lac2	lac3	leu1	leu2		10 to 49.9 %
Aliphatic compounds (18)																													50 to 100%
alcohols (2)
2-methyl butanol	4.298		0	0	0	0	0	0	0	0	0	0	0	0	0	0	0	0	0	0	0	0	4.85	9.59	5.96	0	0
3-methyl 2-pentanol	5.225	45 (100), 56 (17), 41 (14), 43 (11.8), 44 (10.2), 69 (5.6), 57 (4.9), 55 (3.7), 87 (3.2), 46 (2.2)	0	0	0	0	0	0	0	0	0	0	0	0	0	0	0	0	0	0	0	0	0	0	20.37	0	0
ketones (2)
2-heptanone	6.72		0	0	0	0	0	0	0	0	0	0	0	0	0	0	0	0	0	0	0.82	1.52	0	0	0	0	0
5-methyl-2-heptanone	8.48		0	0	0	0	0	0	0	0	0	0	0	0	0	0	0	0	0	0	0	0	0	0	0	0.28	0.55
esters (9)
isopropyl propanoate	4.1		0	0	0	0	0	0	0	0	0	0	0	0	0	0	0	0	0	0	2.79	0	0	0	0	0	0
isopropyl isobutanoate	4.74		0	0	0	0	0	0	0	0	0	0	0	0	0	0	0	0	0	0	9.9	4.17	0	0	0	0	0
isopropyl butanoate	5.6		0	0	0	0	0	0	0	0	0	0	0	0	0	0	0	0	0	0	14.74	4.01	0	0	0	0	0
propyl 2-methyl butyrate	6.815		0	0	0	0	0	0	0	0	0	0	0	0	0	0	0	0	0	0	0	0	0	0	10.1	0	0
isopropyl 2-methyl butyrate	7.49		0	0	0	0	0	0	0	0	0	0	0	0	0	0	0	0	0	0	0.66	0	0	0	0	0	0
isobutyl-2-methylbutyrate	8.44		0	0	0	0	0	0	0	0	0	0	0	0	0	0	0	0	0	0	0.27	3.38	0	0	0	0	0
2-methylbutyl 2-methylbutyrate	9.254		0	0	0	0	0	0	0	0	0	0	0	0	0	0	0	0	0	0	3.49	0	0	0	0	0	0
pentyl 2-methylbutyrate	10.118		0	0	0	0	0	0	0	0	0	0	0	0	0	0	0	0	0	0	2.89	1.49	0	0	0	0	0
unknown ester	12.83	57(100), 85(55), 56(52), 41(32), 98(19), 70(17), 43(16), 103(14), 55(11), 69(10)	0	0	0	0	0	0	0	0	0	0	0	0	0	0	0	0	0	0	3.58	0.45	0	0	0	0	0
alkenes and aldehydes (5)
alkene (M+ 196; tetradecene?)	14.726	55(100), 41(85), 43(75), 69(71), 56(67), 57(63), 70(62), 83(54), 97(39), 84(32)	0	0	0	0	0	0	0	0	0	0	0.24	0.03	0	0	0	0	0	0	0	0	0	0	0	0	0
alkanal (penta/tetradecanal?)	15.287	41(100), 43(98), 57(97), 55(73), 82(61), 68(46), 56(40), 44(40), 69(38), 67(39)	0	0	0	0	0	0	0	0	0	0	0.47	0.18	0	0	0	0	0	0	0	0	0	0	0	0	0
alkene (M+210 pentadecene?)	15.964	55(100), 41(74), 69(70), 43(63), 83(58), 57(58), 56(56), 70(52), 97(46), 84(29)	0	0	0	0	0	0	0	0	0	0	0.65	0.16	0	0	0	0	0	0	0	0	0	0	0	0	0
aliphatic alkenal unknown	17.62	55(100), 41(76), 67(45), 81(40), 54(26), 43(26), 98(25), 70(23), 82(23), 83(22)	4.11	4	2.51	0.66	10.91	9.06	0	0	0	0	0.46	0.16	0	0	0	0	0	0	0	0	0	0	0	0	0
alkenal unknown	19.99	55(100), 41(68), 69(43), 67(40), 81(35), 43(30), 82(28), 83(27), 98(25), 95(25)	0.36	2.49	1.49	1.1	0	0	0	0	0	0	3.97	3.7	0	0	0	0	0	0	0	0	0	0	0	0	0
Aromatic compounds (21)
benzaldehyde	8.79		0	0	0	0	0	0	0	0	0	0	26.78	23.31	96.68	96.33	0	0	0	0	0	0	0	0	0	0	0
p-methyl anisol	9.52		0	0	0	0	0	0	0	0	0	0	0	0	0	0	0	0	0	0	1.03	2.94	0	0	0	14.34	16.92
benzyl alcohol	9.98		0	0	0	0	0	0	0	0	0	0	25.99	3.24	3.32	3.6	0	0	0	0	0	0	0	0	0	0	0
salicylaldehyde	10.23		0	0	0	0	0	0	0	0	0	0	0.04	0.48	0	0	0	0	0	0	0	0	0	0	0	0	0
p-cresol	10.49		0	0	0	0	0	0	0	0	0	0	0	0	0	0	0	0	0	0	0.47	2	0	0	0	2.18	1.62
acetophenone	10.53		0	0	0	0	0	0	0	0	0	0	0	0	0	0	0	0	3.65	0.82	0.59	1.66	0	0	0	2.07	1.69
methyl benzoate	10.82		0	0	0	0	30.58	14.91	33.16	19.98	0.93	3.92	1.89	0.13	0	0	0	0	0	0	0	0	0.62	1.92	0	0	0
benzyl acetate	11.94		0	0	0	0	0	0	0	0	0	0	0.35	0.15	0	0.07	0	0	0	0	0	0	0	0	0	0	0
unknown (thiophenol?)	11.981	123(100), 152(33), 45(27), 110(21), 79(18), 97(12), 77(11), 124(9), 51(6), 125(5)	0	0	0	0	0	0	0	0	0	0	0	0	0	0	0	0	0	0	2.67	0	0	0	0	0	0
3-OH acetophenone	12.104	121 (100), 93 (42), 65 (34), 136 (32), 43 (25), 69 (21), 71 (15), 84 (11), 41 (10), 53 (8)	0	0	0	0	0	0	0	0	0	0	0	0	0	0	0	0	0	0	0	0	0	0	0.54	0	0
unknown (thiophenol?)	12.149	137(100), 152(45), 45(12), 56(11), 91(10), 97(10), 138(9), 103(9), 123(8), 57(7)	0	0	0	0	0	0	0	0	0	0	0	0	0	0	0	0	0	0	1.24	0	0	0	0	0	0
unknown (thiophenol?)	12.23	123(100), 152(46), 137(32), 45(27), 79(19), 110(18), 97(13), 77(13), 124(9), 91(6)	0	0	0	0	0	0	0	0	0	0	0	0	0	0	0	0	0	0	3.17	0.6	0	0	0	0	0
isopropyl benzoate	12.401		0	0	0	0	0	0	0	0	0	0	0	0	0	0	0	0	0	0	0	0	0	0	2.69	0	0
methyl salicylate	12.52		0	0	0	0	0	0	0	0	0	0	11.65	41.4	0	0	0	0	0	0	0	0	0	0	0	0	0
benzyl isobutyrate	13.25		0	0	0	0	0	0	0	0	0	0	0	0	0	0	0	0	0	0	1.08	1.61	0	0	0	0	0
2,3,4-trimethylphenylethanone	14.301	91(100), 147(95), 119(53), 41(31) 162(23), 57(21), 77(21), 79(14), 115(14), 51(13)	0	0	0	0	0	0	0	0	0	0	0	0	0	0	0	0	0	0	0	0	1.01	1.24	0	0	0
dimethyl salicylate	14.63		0	0	0	0	0	0	0	0	0	0	0.45	0.6	0	0	0	0	0	0	0	0	0	0	0	0	0
benzyl isovalerate	15.18		0	0	0	0	0	0	0	0	0	0	0.2	0.3	0	0	0	0	0	0	0.62	1.89	0	0	0	0	0
3-methylbutyl (isoamyl) salicylate	17.08		0	0	0	0	0	0	0	0	0	0	0	0.07	0	0	0	0	0	0	0	0	0	0	0	0	0
benzyl benzoate	19.98		0.24	0.64	5.24	0.19	2.7	4.12	0	0	0	0	0.99	3.37	0	0	0	0	0	0	0	0	0	0	0	0	0
benzyl salicylate	21.13		0	0	0	0	0	0	0	0	0	0	4.26	4.34	0	0	0	0	0	0	0	0	0	0	0	0	0
Monoterpenoids (16)
tricyclene	7.319		0	0	0	0	0	0	0	0	0	0	0	0	0	0	0	0	0	0	0	0	0.28	0.28	0.59	0	0
α-pinene	7.562		0	0	0	0	0	0	0	0	0	0	0	0	0	0	0	0	0	0	0	0	3.34	1.75	1.94	0	0
camphene	7.877		0	0	0	0	0	0	0	0	0	0	0	0	0	0	0	0	0	0	0	0	11.37	6.05	4.68	0	0
3,7-dimethyl-1-octene	7.07	43(100), 70(53), 56(53), 41(50), 55(50), 71(42), 69(36), 57(12), 103(11), 42(11)	0	0	0	0	0	0	0	0	0	0	0	0	0	0	0	0	0	0	0	0	0	0	0	7.03	14.89
3,7-dimethyl-1,6-octadiene (β-citronellene)	7.75	67(100), 41(87), 55(85), 69(80), 95(66), 82(63), 68(48), 81(45), 96(20), 53(16)	0	0	0	0	0	0	0	0	0	0	0	0	0	0	0	0	0	0	0	0	0	0	0	0	0.07
sabinene	8.39		0	0	0	0	0	0	0	0	0	0	0	0	0	0	0	0	0	0	0	0	0.67	1.34	0.4	0	0
β-myrcene	8.648		0	0	0	0	0	0	0	0	0	0	0	0	0	0	0	0	0	0	0	0	2.27	3.44	2.38	0	0
dehydroxylinalool oxide isomer	8.75	67(100), 68(61), 55(47), 43(44), 41(26), 96(25), 82(24), 110(17), 81(15), 69(12)	0	0	0	0	0	0	0	0	0	0	0	0	0	0	0	0	0	0	0	0	0	0	0	46.64	39.71
dehydroxylinalool oxide isomer	9.03	67(100), 68(60), 55(60), 43(42), 41(28), 82(25), 96(20), 81(15), 110(15), 95(12)	0	0	0	0	0	0	0	0	0	0	0	0	0	0	0	0	0	0	0	0	0	0	0	27.44	24.55
p-cymene	9.416		0	0	0	0	0	0	0	0	0	0	0	0	0	0	0	0	0	0	0	0	1.31	1.3	0.44	0	0
limonene	9.464		0	0	0	0	0	0	0	0	0	0	0	0	0	0	0	0	0	0	0	0	41.34	37.63	25.29	0	0
(E)-β-ocimene	9.674		0	0	0	0	0	0	0	0	0	0	0	0	0	0	0	0	0	0	0	0	0.49	0.95	0.88	0	0
linalool	10.63		24.51	20.95	45.42	39.51	24.02	31.17	31.47	21.8	13.84	30.36	0	0	0	0	0	0	0	0	0	0	0.35	1.08	0.52	0	0
camphene hydrate	11.591		0	0	0	0	0	0	0	0	0	0	0	0	0	0	0	0	0	0	0	0	3.01	3.86	2.04	0	0
camphor	11.61		0	0	0	0	0	0	0	0	0	0	0	0	0	0	0	0	0	0	0	0	1.77	1.43	0.55	0	0
isoborneol	11.876		0	0	0	0	0	0	0	0	0	0	0	0	0	0	0	0	0	0	0	0	0.45	1.62	0.56	0	0
Sesquiterpenoids (8)
(E)-β-caryophyllene	15.38		0	0	0.28	0	0.66	0.95	0.95	0	0.46	0	0	0	0	0	0	0	0	0	0	0	0	0	0	0	0
(E)-β-farnesene	15.58		0	0	0	0	0	0.4	0	0	0.38	0	0	0	0	0	0	0	0	0	0	0	0	0	0	0	0
(E,E)-α-farnesene	16.27		0	0	0	0	0	0.94	16.99	0	0.85	4.1	0	0	0	0	0	0	0	0	0	0	0	0	0	0	0
(E)-nerolidol	17.05		59.68	65.03	39	49.4	19.5	29.31	9.53	46.02	76.04	51.33	0	0	0	0	91.39	95.55	0	0	0	0	0	0	0	0	0
farnesol isomer	19.08		0	0	0	0	0	0	0	0	0	0	5.03	0.44	0	0	2.35	1.31	0	0	0	0	0	0	0	0	0
(E,E)-farnesol	19.13		0	0	0	0	0	0	0	0	0	0	1.84	1.56	0	0	0	0	0	0	0	0	0	0	0	0	0
(E,E)-farnesal	19.39		0	0	0	0	0	0	0	0	0	0	14.38	16.02	0	0	6.27	3.14	0	0	0	0	0	0	0	0	0
farnesol isomer	20.29		0	0	0	0	0	0	0	0	0	0	0.3	0.31	0	0	0	0	0	0	0	0	0	0	0	0	0
Irregular terpenoids (3)
(E)-4,8-dimethyl-1,3,7-nonatriene	10.75		3.44	2.9	2.76	2.87	4.47	2.27	5	8.37	3	8.05	0	0	0	0	0	0	0	0	0	0	0	0	0	0	0
6,11-dimethyl-2,6,10-dodecatrien-1-ol?	13.574	69(100), 41(96), 43(21), 67(20), 109(19), 55(18), 123(15), 81(13), 53(11), 179(10)	0	0	0	0	0	0	0	0	0	0	0.06	0.05	0	0	0	0	0	0	0	0	0	0	0	0	0
(E)-4,8,12-trimethyltrideca-1,3,7,11-tetraene	17.13		7.66	3.99	3.3	6.28	7.16	6.87	2.9	3.83	4.5	2.24	0	0	0	0	0	0	0	0	0	0	0	0	0	0	0
N-compounds (11)
1-butyl pyrrole	8.144	80(100), 81(57), 123(44), 68(33), 91(23), 53(21), 67(19), 55(18), 54(17), 82(16)	0	0	0	0	0	0	0	0	0	0	0	0	0	0	0	0	0	0	0	0	0.68	0.26	0	0	0
1-(2-methylbutyl) pyrrole	9.998	81(100), 80(64), 41(20), 137(19), 59(16), 53(15), 68(13), 69(10), 67(10), 54(9)	0	0	0	0	0	0	0	0	0	0	0	0	0	0	0	0	0	0	0	0	2.48	1.03	0	0	0
2,4-dimethyl pyrrole	11.66	94(100), 95(60), 80(20), 151(19), 82(14), 53(9), 81(9), 78(8), 41(8), 67(7)	0	0	0	0	0	0	0	0	0	0	0	0	0	0	0	0	0	0	0	0	1.94	1.77	0.3	0	0
2,3-dimethyl piperidine	11.72	98(100), 56(46), 42(43), 57(41), 43(38), 44(34), 41(26), 70(25), 55(25), 112(22)	0	0	0	0	0	0	0	0	0	0	0	0	0	0	0	0	0	0	0	0	3.84	2.79	0.28	0	0
indole	13.565		0	0	0	0	0	0	0	0	0	0	0	0	0	0	0	0	0	0	0.2	3.49	0	0	0	0	0
4-methyl piperidine	14.505	98(100), 56(39), 57(31), 44(31), 43(30), 42(25), 41(21), 113(19), 70(14), 55(13)	0	0	0	0	0	0	0	0	0	0	0	0	0	0	0	0	0	0	0	0	1.13	2.03	0.02	0	0
piperidine-related unknown	15.305	98(100), 57(47), 56(38), 43(36), 44(30), 113(24), 71(22), 42(20), 41(16), 70(14)	0	0	0	0	0	0	0	0	0	0	0	0	0	0	0	0	0	0	0	0	0.08	0.25	0	0	0
piperidine-related unknown	15.791	98(100), 57(36), 56(34), 44(29), 43(27), 42(20), 41(20), 113(20), 55(15), 70(14)	0	0	0	0	0	0	0	0	0	0	0	0	0	0	0	0	0	0	0	0	4.47	5.04	1.44	0	0
piperidine-related unknown	17.015	98(100), 57(33), 56(30), 44(27), 43(24), 113(22), 41(17), 42(17), 55(13), 70(12)	0	0	0	0	0	0	0	0	0	0	0	0	0	0	0	0	0	0	0	0	6.18	7.56	0.35	0	0
piperidine-related unknown	18.17	98(100), 44(25), 56(25), 113(19), 42(14), 41(12), 43(12), 57(10), 55(8), 68(8)	0	0	0	0	0	0	0	0	0	0	0	0	0	0	0	0	0	0	0	0	0.15	0.32	0	0	0
piperidine-related unknown	19.295	98(100), 113(25), 57(24), 56(23), 44(23), 43(22), 42(16), 41(14), 55(10), 84(10)	0	0	0	0	0	0	0	0	0	0	0	0	0	0	0	0	0	0	0	0	0.3	0.23	0	0	0
S-compounds (7)
S-methyl thioacetate	3.5	43(100), 90(16), 47(12), 46(11), 45(11), 44(6)	0	0	0	0	0	0	0	0	0	0	0	0	0	0	0	0	0	0	0	3.7	0	0	0	0	0
dimethyl disulfide	4.45		0	0	0	0	0	0	0	0	0	0	0	0	0	0	0	0	72.92	85.76	1.54	1.3	4.19	4.44	5.08	0	0
S-methyl thiopropanoate	5.1	57(100), 45(32), 47(27), 104(21), 48(15), 75(12), 46(10), 61(6), 43(6), 58(5)	0	0	0	0	0	0	0	0	0	0	0	0	0	0	0	0	0	0	0	54.07	0	0	0	0.01	0
S-methyl thiobutanoate	5.91	43(100), 41(40), 71(25), 48(15), 47(11), 45(10), 42(10), 75(6), 49(5), 118(4)	0	0	0	0	0	0	0	0	0	0	0	0	0	0	0	0	0	0	0	5.93	0	0	0	0.01	0
S-methyl thioisopropionate	6.305	43(100), 57(44), 41(43), 85(15), 42(9), 74(8), 56(8), 103(7), 45(6), 59(6)	0	0	0	0	0	0	0	0	0	0	0	0	0	0	0	0	0	0	43.04	4.75	0	0	12.1	0	0
dimethyl trisulfide	8.62		0	0	0	0	0	0	0	0	0	0	0	0	0	0	0	0	23.43	13.42	0.01	0.01	1.43	0.8	0.5	0	0
2-isopentyl thiophene	11.159	97(100), 98(26), 45(15), 53(12), 154(9), 42(5), 41(3), 43(3), 99(2), 56(1)	0	0	0	0	0	0	0	0	0	0	0	0	0	0	0	0	0	0	5.2	1.03	0	0	0	0	0
84 total volatiles
bold text: identifications verified by co-chromatography with authentic standards
blue text: tentative identifications suggested by mass spectra and retention index consistent with published data (other studies or NIST webbook: https://webbook.nist.gov/)
italic text: unknowns assigned to compound class due to mass spectra (listing the 10 most abundant m/z ion fragments in descending order from the base peak (= 100%))
