# Supplementary material for: Floral Scent Evolution in the Genus Jaborosa (Solanaceae): Influence of Ecological and Environmental Factors
Source: Plants (Basel). 2021 Jul 23;10(8):1512. doi: 10.3390/plants10081512 (PMC8398055; doi:10.3390/plants10081512)
Supplement: Supplementary file 1 [file plants-10-01512-s001.zip › Table S4.xlsx]

## Sheet: J sativa SPME stabilwax data
Table S4: Intensive study of floral volatiles from Jaborosa sativa using SPME-GC-MS with a polar (EC-Wax) GC column, varying the number and fresh mass of whole and dissected flowers.
VOLATILE ANALYSIS FOR JABOROSA SATIVA, USING SPME-GC-MS		on EC WAX column			A: INCREASING FLOWER NUMBER					B: CONSTANT FLOWER NUMBER (4), DISSECTED PARTS							C: CONSTANT FLOWER MASS (4 FLW EQUIVALENTS), DISSECTED PARTS
Volatile Classes, Compounds	MS ion fragments (m/z)	RT, min.	calc. KI	ID	4 flws	8 flws	16 flws		4 cut flws, whole		4 cut flws, petals only		4 cut flws, sex organs		4 buds		4 flws, M	petals, M	sex org, M	4 flws, IM	buds
Aliphatic compounds (32)
1-octene	41(100), 43(82), 42(65), 55(58), 56(51), 70(30), 69(11), 57(10), 83(9), 44(9)	2.204	< 900	KI	1.11	1.61	2.33		2.49	1.41	1.95		1.36	1.45	10.25		0.41		0.52	0.96	2.71	2.75
Alcohols
2-propanol		3.052	< 900	AS	6.62	3.03	0.11			12.2	0.39		11.38	20.79	6.41		4.72	1.1	29.32	4.94	14.08	4.39
2-methyl butanol		7.75	1197.77	AS	0.59	0.34	0.23		0.31	0.77	0.63		1.31	0.5				0.68	0.74		0.62	2.6
1-octen-3-ol		11.506	1443.95	AS	0.77	0.63	0.85		0.51	0.29	0.68		2.05	0.57			0.89	0.67	0.37
1-octanol		13	1553.6	KI	0.44	0.5	0.54		0.81		0.82		4.18	1.47	0.29
Aldehydes
hexanal*		5.596	1072.52	AS	2.67	1.3	1.04		0.95	1	1.34		4.46	1.45	2.54			0.95	1.45	0.98	0.93	2.14
heptanal*		7.446	1180.78	KI	1.54	1.61	1.69		1.67	0.47	0.75		2.55	1.27	1.99		0.28
octanal*		9.181	1283.8	KI	1.61	1.94	1.86		1.62		1.06	2.56	2.8	0.52	5.33			0.65			1.11	0.76
nonanal*		10.784	1394.61	AS	9.28	13.13	12.02		13.22	3.73	5.9	19.63	12.78	5.05	24.52		1.96	2.24	0.79	3.85	3.43	3.79
Esters
isopropyl acetate		2.677	< 900	AS	0.26	0	0			0.33			0.5	1.64			0.94		2.05	0.66	0.52	0.51
methyl propanoate		2.749	< 900	KI/MS														0.86
methyl isobutyrate		2.967	< 900	KI/MS														2.36
isopropyl isobutyrate	43(100), 41(23), 71(16), 42(10), 89(7), 45(6), 44(4), 59(3), 73(1)...115(M+?)	3.604	925.92	NA	7.33	9.66	8.7		17.53	9.6	6.28	1.09	6.42	14.46	9.26		12.9	6.78	14.11	17.64	16.42	12.88
methyl butyrate		3.895	949.6	KI							0.48		0.58	0.44				0.44	0.25
2-methyl butanoic acid methyl ester		4.25	977.6	KI							0.94							0.86	0.32
ethyl butyrate		4.755	1015.65	KI					0.31		1.52		2.17
isopropyl butyrate*		4.866	1022.86	KI	8.18	11.65	12.45		14.21	16.36	4.45	2.88	16.69	24.1	8.6		13.41	6.28	23.82	28.45	19.18	7.58
isobutyl isobutyrate		5.785	1085.37	KI	0.55	0.37	0.32			0.44					1.14		1.1	0.88	0.06	2.56	2.38	1.68
propyl butyrate		6.336	1118.77	KI	0.43	0.27	0.3			0.45					1.88		1.4	1.06		0.75	1.7	1.83
propyl 2-methylbutyrate*		6.66	1136.87	KI	0.23	0.25	0.28			0.41	0.52						1.09	1.16				1.34
isobutyl butyrate		6.969	1154.19	KI	0.46	0.18	0.26		0.17	0.47	1.06		2.48	0.74	0.83		1.27	1.26	1.56	1.56	2.41	7.47
isobutyl-2-methyl butyrate		7.303	1172.79	KI	0.6	0.44	0.47			0.97	0.57				1.08		1.47	1.51	1.23	2.81	2.59	3.3
3-methylbutyl-2-methyl butyrate		9.028	1274.58	KI	0.2	0.25	0.28		0.28		0.16						0.16	0.3		2.35
2-methylbutyl-2-methyl butyrate		9.04	1275.3	KI	1.05	0.88	0.9		0.54	1.7	0.61	3.2					0.61	1.3			0.95	2.16
Ketones
2-propanone	43(100), 58(19), 40(11), 44(3), 42(3)	2.05	< 900	MS	2.02	0.76	0
3-pentanone		3.73	936	AS															1.09
2-heptanone		7.386	1177.43	AS	0.59	0.92	0.75		1.81	0.75	0.43	1.27	4.8	2.01			0.64			0.59
3-octanone		8.613	1249.58	AS	0.72	0.95	1.15		1.16	0.51	1.19	1.24	2.54	1.36			0.4	0.28	0.67
Unidentified Aliphatics
unknown	43(100), 71(39), 41(31), 55(18), 70(8), 68(6), 44(6), 67(4), 45(3), 47(2)	7.644	1191.84	NA	0.8	0.85	1.12		0.34	0.82	1.43	2.32					0.77	1		0.44	1.27	1.42
unknown	43(100), 71(90), 55(40), 41(28), 70(22), 42(21), 44(10), 69(2), 45(1)	8.781	1259.7	NA	0.39	0.5	0.42											1
unknown	54(100), 41(61), 70(51), 40(18), 43(11), 42(5)	9.371	1295.18	NA									0.49
unknown	45(100), 41(32), 43(32), 57(30), 55(15), 42(12), 71(8)	9.598	1310.64	NA									2.68
Aromatic Compounds (7)
4-methyl anisole		11.47	1441.5	KI	0.16	0.16	0.26		0.25	0.84			0.49	0.53	0.92		0.64	0.13	0.13	1.56	1.16	2.73
thiophenol?	123(100), 152(46), 137(32), 45(27), 79(19), 110(18), 97(13), 77(13), 124(9), 91(6)	13.7	1599.7	MS	0.03	0.19	0.17		0.09				0.35
thiophenol?	137(100), 152(45), 45(12), 56(11), 91(10), 97(10), 138(9), 103(9), 123(8), 57(7)	13.9	1623.1	MS	0.08	0.2	0.51		0.45		0.13		0.82
benzyl propionate		15.795	1783.33	AS	0.64	0.24	0.24		0.51	0.29	0.1
benzy butyrate*		16.77	1864.23	AS	0.92	0.45	0.67		0.69	1.03	0.42	3.05	0.37				0.55	0.29
p-cresol*		18.89	2070.59	AS	0.28	0.11	0.24		0.89	0.72	0.31	3.34	0.66	0.39			0.59		0.32			0.89
m-cresol		18.979	2079.31	AS	0.56	0.25	0.43		1.3	1.21	0.38	4.58	1.32	0.7	0.72		0.64	0.3	0.69			1.32
Monoterpenes (3)
α-pinene		4.441	992.88	AS	0.24	0.38	0.47		0.36	0.61			0.24	0.31	3.24		1.53		0.79	1.52	8.17	6.4
sabinene		6.18	1110.06	AS																0.77	0.69	1.74
β-myrcene		7.077	1160.17	AS	0.22	0.32	0.26							0.12	0.69		0.58		0.26	0.8	1.3	1.98
Nitrogenous Compounds (1)
indole*		22.351	2426.25	AS	0.4	0.58	0.29		0.65		0.72		0.86
Sulfurous Compounds (9)
S-methyl thioacetate	43(100), 90(16), 47(12), 46(11), 45(11), 44(6)	4.963	1029.46	MS	0.78	0.85	0			1.93	0.82						3.18	4.34	1.75
S-methyl thioisopropionate	43(100), 57(44), 41(43), 85(15), 42(9), 74(8), 56(8), 103(7), 45(6), 59(6)	5.059	1035.99	MS	7.36	12.07	11.48		19.04	11.44	7.99	5.19	5.17	12.49	6.67		11.9	9.07	10.25	23.15	14.33	11.37
Dimethyl disulfide		5.37	1057.14	AS	17.63	12.51	9.96		1.4	10.71	1.49	1.97		1.67			10.85	18.2	2.7
S-methyl thiopropanoate*	57(100), 45(32), 47(27), 104(21), 48(15), 75(12), 46(10), 61(6), 43(6), 58(5)	6.247	1113.8	KI	5.14	3.21	4.75		1.79	6.36	18.39		2.09	0.62			11.67	18.41	2.18
S-methyl thiobutanoate*	43(100), 41(40), 71(25), 48(15), 47(11), 45(10), 42(10), 75(6), 49(5), 118(4)	6.501	1127.99	MS	6.94	6.46	9.02		5.05	3.79	22.71	4.3	0.72	0.62			6.8	9.71	1.75	1.23	1.44
S-methyl thiopentanoate	57(100), 41(88), 85(34), 47(15), 45(14), 75(10), 55(8), 48(7), 58(6), 117(5)	7.954	1209.88	MS	2.17	1.98	2.85		0.84	0.97	4.25	4.13					0.41	1.47
Dimethyl trisulfide		10.546	1377.73	AS	3.07	1.99	2.72		1.36	3.48	0.68	6.36		0.83			0.64	0.88	0.58
S-methyl thioheptanoate	43(100), 85(20), 41(12), 113(11), 47(7), 75(6), 42(4), 55(3)	10.9	1402.72	MS	1.18	1.47	1.53				2.17
2-isopentyl thiophene	97(100), 98(26), 45(15), 53(12), 154(9), 42(5), 41(3), 43(3), 99(2), 56(1)	11.699	1457.07	MS	0.57	0.76	0.55		1.04	0.09	0.72	3.45	0.32	0.25	2.1		0.63	0.46		1.92	1.81	2.17
Unidentified Compounds (5)
unknown	41(100), 91(76), 43(76), 55(57), 42(42), 69(26), 56(25), 57(25), 93(24), 70(16)	8.53	1244.58	NA	1.31	1.89	2.94		1.27	0.92	1.99	6.41	1.57	1.71	5.76		0.33	0.89		1.49	0.57	3.11
unknown	41(100), 79(88), 67(60), 80(41), 43(37), 55(37), 93(27), 81(22), 95(22), 108(20)	13.939	1627.83	NA	1.24	0.98	0.83		0.94	1.55		13.39		0.46	2.37		2.76	1.69	0.25		2.64	2.84
unknown	79(100), 43(87), 94(48), 41(35), 55(31), 45(12), 57(10), 71(10), 93(3), 46(3)	14.1	1640.31	NA	0.05	0.12	0.42		0.92	0.25	1.01	3.02						0.23
unknown	43(100), 55(58), 41(53), 79(46), 56(42), 81(39), 57(37), 69(24), 44(12), 42(12)	14.343	1659.15	NA	0.38	0.64	1.14		2.12	0.61	2.09	5.71	2.8	1.48	3.41			0.21
unknown	79(100), 57(82), 94(67), 41(32), 42(26), 67(26), 55(25), 43(10), 44(4)	15.239	1733.24	NA	0.21	0.21	0.18		1.11	0.52	0.47	0.91						0.33
57 total volatiles
ID = level of identification for VOCs:
AS = co-chromatography with authentic standard
KI = consistent with Kovats Retention Index as aggregated on NIST Webbook (https://webbook.nist.gov/)
NA = clear mass spectrum but either AS or KI for appropriate GC column not available
MS = best MS library fit, 10 most abundant mass spectral ion fragments (m/z) in descending order of abundance)
* also detected in solvent-eluted GC-MS analyses of floral headspace collected from living inflorescences (13-15 flws) for 3 hrs, on same GC column
