# Supplementary material for: Floral Scent Evolution in the Genus Jaborosa (Solanaceae): Influence of Ecological and Environmental Factors
Source: Plants (Basel). 2021 Jul 23;10(8):1512. doi: 10.3390/plants10081512 (PMC8398055; doi:10.3390/plants10081512)
Supplement: Supplementary file 1 [file plants-10-01512-s001.zip › Table S5.xls]

## Sheet: updated class
Table S5: Incremental increase in sampling time for cut flowers of Jaborosa leucotricha, collected and analyzed using TD-GC-MS on a non-polar (DB-5) GC column .
Flower number (15), headspace volume (10 ml penicillin flasks) and equilibration time (overnight) were standardized across samples (14 Dec. 2013), varying only in collection time (10, 15, 20 min.).
Headspace data are given as total ion chromatograph (TIC) peak area units and the relative % of each compound to the full volatile blend.
Volatile Compounds, Classes	Ret. Time	MS ion fragments (m/z)	10 minutes		15 minutes		20 minutes
	DB-5, min.		TIC	rel%	TIC	rel%	TIC	rel%
Aliphatic compounds (14)
acids
butanoic acid	5.561		169279	0.92	446748	4.61	650023	3.5
2-methylbutanoic acid	6.75				278074	2.87	2025104	10.89
alcohols
2-heptanol	7.25						690911	3.72
ketones
6 methyl 2 heptanone	8.34	43(100), 58(72), 71(16), 41(13), 95(12), 59(11), 42(11), 72(10), 70(9), 85(9)	102223	0.55	84980	0.88
5 methyl 2 heptanone*	8.48	43(100), 58(41), 71(37), 70(17), 59(15), 54(10), 95(8), 44(6), 113(5), 128(3)	103304	0.56	50249	0.52
2-octanone	8.95		417823	2.27	193645	2
aliphatic ketone	9.99	43(100), 58(92), 82(24), 71(19), 41(19), 59(17), 57(12), 84(10), 81(10), 99(7)	962013	5.22	356610	3.68	373929	2.01
2-nonanone	10.6		2410339	13.07	973674	10.05	1727875	9.29
aliphatic ketone	11.68	58(100), 43(94), 96(30), 71(30), 41(27), 57(25), 59(21), 55(18), 81(11), 69(11)	2171314	11.78	546602	5.64	359666	1.93
2-decanone	12.155		327700	1.78	63403	0.65	45973	0.25
aldehydes
unknown alkenal	18.09	70(100), 57(98), 43(94), 41(87), 55(77), 83(75), 69(59), 82(53), 81(48), 56(43)	47408	0.26			280036	1.51
unknown alkenal	19.355	70(100), 57(77), 55 (68), 41(67), 83(65), 43(45), 69(41), 81(40), 95(34), 67(31)	40812	0.52	26332	0.27	122969	0.66
esters
unknown acetate	9.58	43(100), 87(39), 56(22), 98(14), 41(12), 70(12), 55(12), 69(10), 57(8), 58(8)			38043	0.39	1697097	9.13
unknown fatty acid ester	15.833	79(100), 67(64), 93(50), 80(44), 108(40), 81(39), 95(37), 41(29), 55(29), 77(22)	35001	0.19	15085	0.16	71175	0.38
Aromatic compounds (3)
p-methyl anisol*	9.52		124530	0.68	77120	0.8	980138	5.27
p-cresol*	10.49		49240	0.27	33946	0.35	32890	0.18
acetophenone*	10.53		152047	0.82	57364	0.59	618877	3.33
Monoterpenoids (5)
3,7-dimethyl-1-octene*	7.07	43 (100), 70 (53), 56 (53), 41 (50), 55 (50), 71 (42), 69 (36), 57 (12), 103 (11), 42 (11)	3185804	17.28	2395018	24.69	957183	5.15
3,7-dimethyl-1,6-octadiene (β-citronellene)*	7.75	67 (100), 41 (87), 55 (85), 69 (80), 95 (66), 82 (63), 68 (48), 81 (45), 96 (20), 53 (16)	358988	1.95	182697	1.88	85245	0.46
dehydroxylinalool oxide (herboxide) isomer*	8.75	67(100), 68(62), 55(47), 43(43), 41(25), 96(25), 82(24), 110(18), 81(15), 69(12)	4091300	22.16	2032055	20.97	207209	1.11
dehydroxylinalool oxide (herboxide) isomer*	9.03	67(100), 68(63), 55(62), 43(39), 41(27), 82(26), 96(21), 81(16), 110(15), 95(12)	2088449	11.33	959463	9.9	199688	1.07
2,6-dimethyl-7-octen-3-one	10.23	55(100), 71(62), 43(48), 69(33), 41(27), 83(24), 111(14), 86(9), 67(6), 53(5)	473023	2.57	193414	2	122237	0.66
Sesquiterpenoids (4)
β-elemene	14.957		148350	0.8	35169	0.36	1008265	5.42
sesquiterpene, nr. elemol	17.17	59(100), 93(85), 43(54), 107(52), 105(51), 41(45), 81(44), 57(41), 79(41), 67(38)	20064	0.11	138849	1.43
sesquiterpene, nr. γ-eudesmol	18.224	189(100), 161(82), 105(75), 81(74), 133(69), 91(69), 204(64), 107(62), 95(58), 59(55)	41795	0.23	2147	0.02
sesquiterpene, nr. β-eudesmol	18.614	59(100), 108(31), 149(28), 81(56), 43(25), 93(24), 109(23), 41(22), 67(22), 79(21)	254543	1.38	67705	0.7
S-compounds (4)
S-methyl thiopropanoate*	5.43	57 (100), 104 (45), 47 (14), 48 (9), 75 (5), 58 (5)	7139	0.04	2591	0.03	535319	2.88
S-methyl thiobutanoate*	6.308	43 (100), 71 (62), 41 (40), 118 (21), 48 (17), 75 (15), 47 (13), 42 (7), 45 (7), 49 (6)	24792	0.13	14947	0.15	1069919	5.75
S-methyl thiohexanoate	10.021	43 (100), 81 (48), 99 (34), 71 (20), 41 (20), 58 (17), 55 (14), 75 (13), 131 (9), 82 (6)					445393	2.4
benzothiazole	13.052		2300	0.01	5383	0.06	115492	0.62
Unknowns (6)
unknown, m/z 97	11	97 (100), 41 (69), 69 (21), 43 (13), 55 (10), 53 (9), 79 (8), 67 (7), 98 (6), 144 (5)	39328	0.21	19339	0.2	604919	3.25
unknown, m/z 97	11.721	57 (100), 68 (84), 97 (80), 41 (50), 69 (48), 109 (47), 67 (42), 82 (41), 55 (41), 43 (35).					400681	2.15
unknown	11.759	43 (100), 95 (88), 57 (49), 113 (44), 41 (36), 69 (24), 55 (21), 75 (16), 45 (12), 90 (10).			47061	0.49	219340	1.18
unknown	12.25	55(100), 83(43), 41(25), 110(25), 111(23), 82(9), 67(8), 75(7), 53(6), 42(4)	10457	0.06	10679	0.11	79830	0.43
unknown	12.509	55(100), 111(73), 69(23), 41(17), 43(9), 53(8), 112(6), 83(4), 56(4), 67(4)	525189	2.85	343931	3.55	1857475	9.99
unknown, m/z 97	18.47	97 (100), 57 (51), 99 (19), 83 (17), 55 (16), 69 (15), 43 (15), 41 (13), 123 (12), 98 (11)					1010508	5.43
36 total volatiles
Bold text = co-chromatography with authentic standard
Blue text = definitive MS and/or consistent with retention order on DB-5 column, NIST Webbook (https://webbook.nist.gov/)
Italic text = unknown, putative MS library match and 10 most abundant MS ion fragments (m/z) listed in descending order of abundance (base peak = 100%)
* indicates compound also was found in whole-plant samples of J. leucotricha summarized in Table S3
