# Supplementary material for: Floral Scent Evolution in the Genus Jaborosa (Solanaceae): Influence of Ecological and Environmental Factors
Source: Plants (Basel). 2021 Jul 23;10(8):1512. doi: 10.3390/plants10081512 (PMC8398055; doi:10.3390/plants10081512)
Supplement: Supplementary file 1 [file plants-10-01512-s001.zip › Table S7.xlsx]

## Sheet: Hoja1
Table S7. Provenance data for the eight Jaborosa species studied. We provide information about floral scent collection method (SPE: microtraps combined with thermal desorption, SPME: solid phase microextraction fibers, Solvent: dynamic headspace desorbed with solvent), human perception of floral scent and pollination mode. Detailed information about pollinators identity is provided in [51].
					Floral scent collection method (# samples)
Species	Locality, Province	Latitude S	Longitude W	Altitude (m)	SPE	SPME	Solvent	Human scent perception	Pollination mode
Subropical Lowland clade
Jaborosa integrifolia Lam.	Diamante, Entre Ríos	32° 05´ 58.5´´	60° 38´ 41.7´´	31	3		17	Agreeable, mentholated. Nocturnal.	Hawkmoths
Jaborosa odonelliana Hunz.	El Jardín, Salta	26° 04´ 44.84	65° 23´ 23.43´´	882	8			Agreeable. Nocturnal.	Hawkmoths
Jaborosa runcinata Lam.	Diamante, Entre Ríos	32° 05´ 58.5´´	60° 38´ 41.7´´	31	16		5	Agreeable, almond-like. Nocturnal.	Hawkmoths
Andean clade
Jaborosa leucotricha (Speg.) Hunz.	Potrerillos, Mendoza	32º 58´ 05.22	69º 11´ 02.52	1384	6		6	Fetid. Diurnal.	Saprophilous flies
Jaborosa laciniata (Miers) Hunz.	Las Cuevas, Mendoza	32° 48´ 48.84´´	70° 03´ 31.96	3219	6			Fetid. Diurnal.	Saprophilous flies
Jaborosa reflexa Phil.	Estancia La Leona, Santa Cruz	50º 4´ 5´´	72º 7´ 32.4´´	236	10			Agreeable, sweet. All day.	Generalist by small insects
Jaborosa rotacea (Lillo) Hunz. & Barboza	Tafí del Valle, Tucumán	26º 52´ 36.96´´	65º 41´ 40.20´´	1931	4	23	4	Fetid, carcass-like. Diurnal.	Saprophilous flies
Jaborosa sativa (Miers) Hunz. & Barboza	Balcozna, Catamarca	27º 52´03.72´´	65º 43´48.9´´	1191	4	44		Fetid, garlic-like. Diurnal.	Saprophilous flies
